# Supplementary material for: NMFBFS: A NMF-Based Feature Selection Method in Identifying Pivotal Clinical Symptoms of Hepatocellular Carcinoma
Source: Comput Math Methods Med. 2015 Oct 12;2015:846942. doi: 10.1155/2015/846942 (PMC4633688; doi:10.1155/2015/846942)
Supplement: Supplementary file 1 — Supplementary information includes two Figures and one Table. Fig S1: denotes the results of feature ranking with ReliefF. Fig S2: denotes the results of feature selection with Elastic Net. Table S1: represents the frequencies of each symptom feature appearing positive over the samples in all the clinical stages. [file 846942.f1.pdf]

# NMFBFS: a NMF-based feature selection method in identifying pivotal clinical symptoms of Hepatocellular carcinoma

Zhiwei Ji<sup>1,2,✉</sup>, Guanmin Meng<sup>3,✉</sup>, Deshuang Huang<sup>1</sup>, Xiaoqiang Yue<sup>4,\*</sup>, Bing Wang<sup>1,5,6,\*</sup>

<sup>1</sup>Machine Learning & Systems Biology Lab, School of Electronics and Information Engineering, Tongji University, 4800 Caoan Road, Shanghai 201804, China

<sup>2</sup>School of Information Engineering, Zhejiang A&F University, 88 Huancheng North Road, Linan 311300, China

<sup>3</sup>Department of Clinical Laboratory, Tongde Hospital of Zhejiang Province, 234th Gucui Road, Hangzhou 310012, China

<sup>4</sup>Department of Traditional Chinese Medicine, Changzheng Hospital, Second Military Medical University, 415 Fengyang Road, Shanghai 200003, China

<sup>5</sup>The Advanced Research Institute of Intelligent Sensing Network, Tongji University, 4800 Caoan Road, Shanghai 201804, China

<sup>6</sup>The Key Laboratory of Embedded System and Service Computing, Tongji University, 4800 Caoan Road, Shanghai 201804, China

## Supplementary Materials

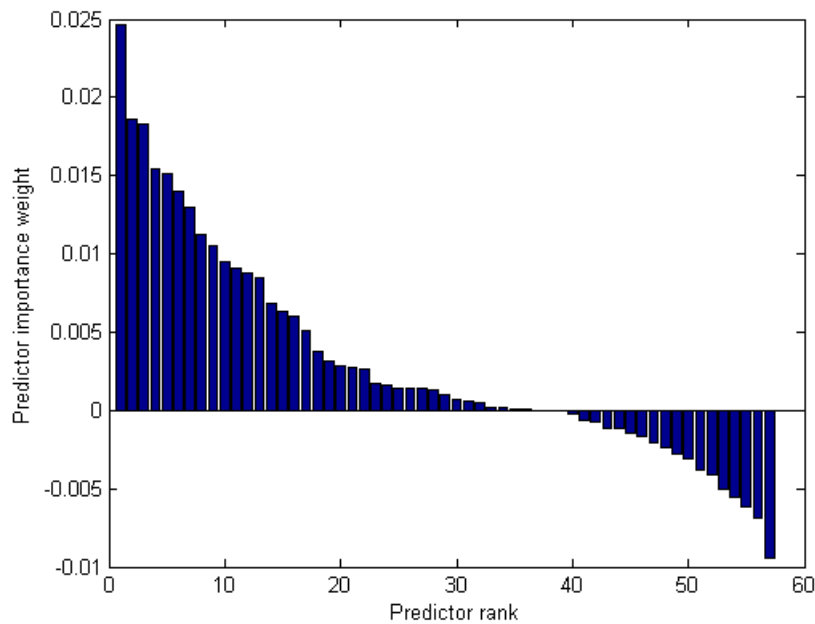

**Fig. S1** ReliefF calculated the weight of each feature in original dataset.

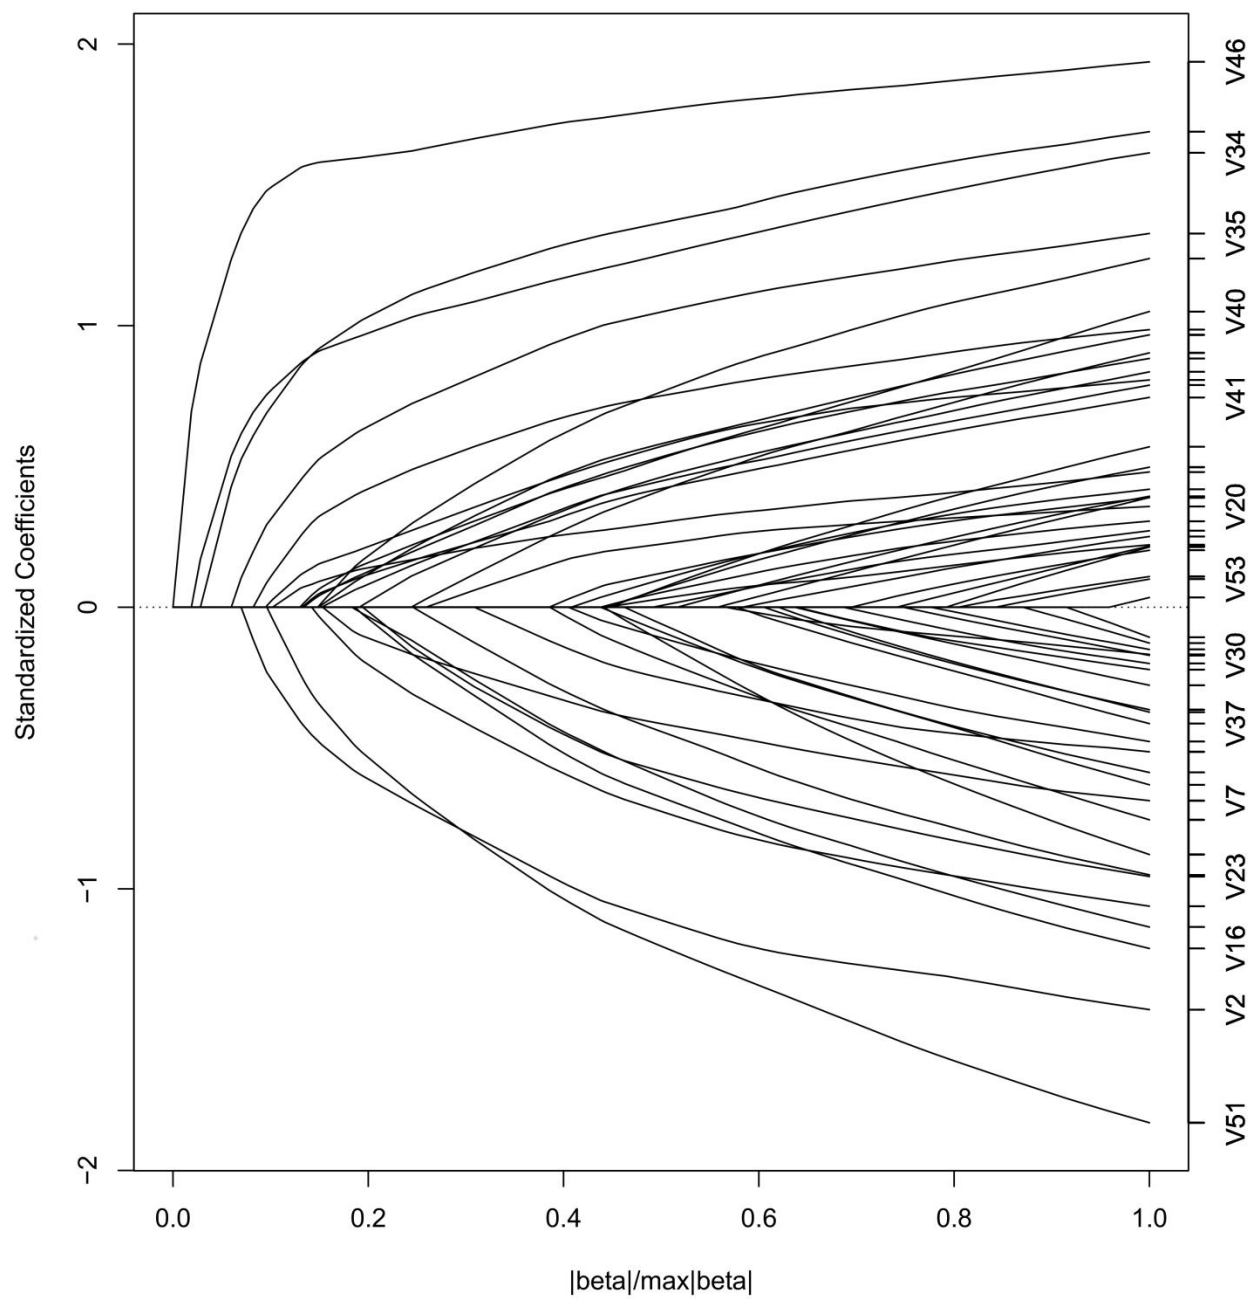

**Fig. S2** Elastic net ( $\lambda=0.5$ ) solution paths for feature selection.

**Table S1.** The frequencies of each symptom feature appearing positive over the samples in all the clinical stages

| symptoms | Phase I  |          | Phase II  |           | Phase III  |            |
|----------|----------|----------|-----------|-----------|------------|------------|
|          | Phase IA | Phase IB | Phase IIA | Phase IIB | Phase IIIA | Phase IIIB |
| V1       | 0.00%    | 5.41%    | 6.67%     | 5.19%     | 4.50%      | 0.00%      |
| V2       | 51.11%   | 40.54%   | 45.00%    | 34.07%    | 33.33%     | 26.32%     |
| V3       | 42.22%   | 21.62%   | 33.33%    | 29.63%    | 38.74%     | 47.37%     |
| V4       | 68.89%   | 56.76%   | 60.00%    | 54.07%    | 54.05%     | 52.63%     |
| V5       | 40.00%   | 29.73%   | 53.33%    | 44.44%    | 45.05%     | 36.84%     |
| V6       | 22.22%   | 10.81%   | 11.67%    | 14.07%    | 19.82%     | 21.05%     |
| V7       | 37.78%   | 29.73%   | 31.67%    | 17.78%    | 25.23%     | 21.05%     |
| V8       | 8.89%    | 8.11%    | 21.67%    | 13.33%    | 16.22%     | 5.26%      |
| V9       | 48.89%   | 43.24%   | 36.67%    | 38.52%    | 42.34%     | 31.58%     |
| V10      | 64.44%   | 54.05%   | 63.33%    | 60.00%    | 61.26%     | 47.37%     |
| V11      | 15.56%   | 8.11%    | 10.00%    | 17.04%    | 18.92%     | 5.26%      |
| V12      | 26.67%   | 27.03%   | 31.67%    | 29.63%    | 22.52%     | 42.11%     |
| V13      | 6.67%    | 8.11%    | 10.00%    | 10.37%    | 7.21%      | 0.00%      |
| V14      | 77.78%   | 75.68%   | 60.00%    | 60.00%    | 53.15%     | 57.89%     |
| V15      | 33.33%   | 21.62%   | 41.67%    | 28.89%    | 32.43%     | 5.26%      |
| V16      | 2.22%    | 8.11%    | 1.67%     | 5.19%     | 3.60%      | 0.00%      |
| V17      | 11.11%   | 10.81%   | 8.33%     | 12.59%    | 12.61%     | 26.32%     |
| V18      | 13.33%   | 27.03%   | 21.67%    | 29.63%    | 18.02%     | 36.84%     |
| V19      | 13.33%   | 16.22%   | 20.00%    | 17.04%    | 21.62%     | 26.32%     |
| V20      | 11.11%   | 2.70%    | 8.33%     | 8.89%     | 12.61%     | 21.05%     |
| V21      | 20.00%   | 16.22%   | 15.00%    | 13.33%    | 18.92%     | 15.79%     |
| V22      | 22.22%   | 29.73%   | 25.00%    | 20.00%    | 23.42%     | 31.58%     |
| V23      | 17.78%   | 35.14%   | 20.00%    | 25.19%    | 22.52%     | 10.53%     |
| V24      | 22.22%   | 24.32%   | 13.33%    | 14.07%    | 16.22%     | 10.53%     |
| V25      | 37.78%   | 51.35%   | 33.33%    | 46.67%    | 62.16%     | 63.16%     |
| V26      | 28.89%   | 35.14%   | 31.67%    | 34.07%    | 45.95%     | 36.84%     |
| V27      | 11.11%   | 8.11%    | 8.33%     | 8.89%     | 15.32%     | 5.26%      |
| V28      | 11.11%   | 8.11%    | 11.67%    | 11.11%    | 18.92%     | 21.05%     |
| V29      | 0.00%    | 0.00%    | 6.67%     | 1.48%     | 2.70%      | 10.53%     |
| V30      | 46.67%   | 59.46%   | 56.67%    | 45.19%    | 57.66%     | 57.89%     |
| V31      | 15.56%   | 10.81%   | 15.00%    | 11.11%    | 9.91%      | 10.53%     |
| V32      | 24.44%   | 32.43%   | 30.00%    | 29.63%    | 32.43%     | 47.37%     |
| V33      | 8.89%    | 24.32%   | 13.33%    | 18.52%    | 21.62%     | 26.32%     |
| V34      | 17.78%   | 21.62%   | 21.67%    | 27.41%    | 39.64%     | 21.05%     |
| V35      | 13.33%   | 13.51%   | 13.33%    | 15.56%    | 26.13%     | 21.05%     |
| V36      | 22.22%   | 32.43%   | 30.00%    | 32.59%    | 34.23%     | 21.05%     |

|     |        |        |        |        |        |        |
|-----|--------|--------|--------|--------|--------|--------|
| V37 | 28.89% | 27.03% | 20.00% | 17.04% | 24.32% | 26.32% |
| V38 | 11.11% | 5.41%  | 6.67%  | 10.37% | 11.71% | 21.05% |
| V39 | 33.33% | 27.03% | 31.67% | 21.48% | 28.83% | 31.58% |
| V40 | 22.22% | 32.43% | 23.33% | 39.26% | 34.23% | 52.63% |
| V41 | 0.00%  | 2.70%  | 0.00%  | 0.00%  | 5.41%  | 0.00%  |
| V42 | 24.44% | 29.73% | 21.67% | 25.19% | 36.94% | 42.11% |
| V43 | 4.44%  | 0.00%  | 5.00%  | 8.89%  | 6.31%  | 5.26%  |
| V44 | 33.33% | 43.24% | 38.33% | 29.63% | 32.43% | 31.58% |
| V45 | 13.33% | 18.92% | 16.67% | 14.07% | 22.52% | 15.79% |
| V46 | 40.00% | 51.35% | 40.00% | 59.26% | 65.77% | 57.89% |
| V47 | 0.00%  | 2.70%  | 3.33%  | 2.22%  | 2.70%  | 0.00%  |
| V48 | 0.00%  | 2.70%  | 1.67%  | 5.19%  | 2.70%  | 10.53% |
| V49 | 4.44%  | 18.92% | 13.33% | 16.30% | 28.83% | 10.53% |
| V50 | 13.33% | 16.22% | 15.00% | 26.67% | 27.93% | 42.11% |
| V51 | 6.67%  | 2.70%  | 1.67%  | 3.70%  | 2.70%  | 0.00%  |
| V52 | 73.33% | 56.76% | 61.67% | 58.52% | 63.06% | 52.63% |
| V53 | 24.44% | 16.22% | 18.33% | 21.48% | 23.42% | 15.79% |
| V54 | 22.22% | 21.62% | 28.33% | 16.30% | 18.92% | 10.53% |
| V55 | 4.44%  | 2.70%  | 1.67%  | 0.74%  | 5.41%  | 5.26%  |
| V56 | 4.44%  | 5.41%  | 8.33%  | 3.70%  | 3.60%  | 0.00%  |
| V57 | 35.56% | 40.54% | 45.00% | 37.04% | 41.44% | 42.11% |
